# Supplementary material for: WISER: an innovative and efficient method for correcting population structure in omics-based prediction and selection
Source: bioRxiv preprint, doi:10.1101/2025.07.17.665325, version 1 (2025-07-21)
Supplement: Supplementary File 2 [file 665325_file31.docx]

**WISER: an innovative and efficient method for correcting population structure in omics-based prediction and selection**

Laval Jacquin, Walter Guerra, Mariusz Lewandowski, Andrea Patocchi, Marijn Rymenants, Charles-Eric Durel, François Laurens, Maria José Aranzana, Lidia Lozano, Hélène Muranty

**WISER approximate Bayesian computation (ABC) algorithm:**

The ABC algorithm implemented in WISER for estimating and is structured as follows:

1. Define the prior distributions for and :
2. Simulate the data :

For each simulation (where ,

- Sample and from their prior distributions
- Sample the random genetic effects:
- Sample the random residuals:
- Simulate the vector of phenotypes:

1. Compute the distance between the observed and simulated phenotypes:

1. Define an acceptance/rejection threshold for distances based on a -quantile:

-quantile (..,

is the value estimated from the ordered distribution of , such that the empirical distribution function captures % of the ordered distribution. In other words, only the distances that are less than or equal to are retained, representing % of the total.

1. Accept parameter sets :

Only parameter sets for which are accepted.

1. Estimate the parameters a posteriori:

After obtaining the distribution of distances, the a posteriori means of the parameters are computed as follows:

where corresponds to the indices of the accepted parameter sets.

For this algorithm, we chose the following parameters:

- , and

It is noted that this algorithm also requires the vector ​ in order to estimate and . Before the simulation step, this vector is calculated by setting . It is then recalculated after each estimation of the components and by the proposed ABC algorithm, and this process is repeated at least once, or as many times as necessary, as defined by the user.

**WISER shrinkage and regularization procedures:**

Let ​ denote a regularized and positive-definite form of ​. A general and established approach for computing is given by [51, 53]:

where is the shrinkage intensity parameter and is any measure of the size of which scales with its dimensions. The computed matrix ​ is generally referred to as a shrinkage estimator because it progressively shrinks as increases, converging toward , a matrix proportional to the identity matrix. Possible choices for include the trace, , or any matrix norm, such as the Frobenius norm, , which are both implemented in WISER.

However, as increases, both the diagonal and off-diagonal elements of the covariance structure associated to are modified. This alteration may be undesirable, especially when the off-diagonal elements, which capture essential covariance information, are critical. To avoid such modifications, a simpler regularized and positive-definite form of ​ can be used:

In WISER, both and are available, with as the default. This default, which uses , has shown the best performance across various traits and specifications. The shrinkage intensity parameter is determined via K-fold cross-validation to minimize mean square error (MSE) based on omics data. The predictive models implemented in WISER include random forest (RF), support vector regression (SVR), the best linear unbiased predictor (BLUP), reproducing kernel Hilbert space (RKHS) regression, and the least absolute shrinkage selection operator (LASSO).
